# Supplementary material for: Light harvesting zinc naphthalocyanine–perylenediimide supramolecular dyads: long-lived charge-separated states in nonpolar media
Source: Royal Society of Chemistry journal article supplement (doi:10.1039/c2cp23285e), 2012-01-01
Supplement: c2cp23285e.pdf [file c2cp23285e.pdf]

## Complementary Supporting Information's

### Light harvesting zinc naphthalocyanine-perylenediimide supramolecular dyads: Long-lived charge-separated states in nonpolar media

Mohamed E. El-Khouly, Ana M. Gutiérrez, Ángela Sastre-Santos, Fernando Fernández-Lázaro and Shunichi Fukuzumi

#### Contents:

**Fig. S1** UV-visible spectral changes observed during the complexation of ZnNc with PDIIm to form **2** in toluene. Inset: Benesi-Hildebrand analysis of the absorbance data.

**Fig. S2** Optimized structure and ab initio B3LYP/6-311G calculated frontier HOMO and LUMO for the self-assembled dyad **2**.

**Fig. 5** Fluorescence spectra of PDIpy (1.46  $\mu\text{M}$ ) in the presence of increasing amounts of ZnNc (0-100  $\mu\text{M}$ ) in toluene ( $\lambda_{\text{ex}} = 480 \text{ nm}$ ). Inset: Benesi-Hildebrand analysis of the fluorescence data.

**Fig. S4** Stern-Volmer plot for the fluorescence quenching of PDIpy by ZnNc in benzonitrile;  $\lambda_{\text{ex}} = 480 \text{ nm}$ .

**Fig. S5** Differential absorption spectra obtained upon femtosecond flash photolysis (390 nm) of ZnNc in deaerated toluene with several time delays between 20 and 2700 ps at room temperature. Inset: Decay profile of the  $^1\text{ZnNc}^*$  and rise profile of the  $^3\text{ZnNc}^*$  at 912 and 600 nm, respectively.

**Fig. S6** Absorption spectra of ZnNc radical cation ( $\text{ZnNc}^{\cdot+}$ ) obtained by treating ZnNc with tris(4-bromophenyl)aminium hexachloroantimonate in benzonitrile.

**Fig. S7** Absorption spectra of PDIpy radical anion ( $\text{PDIpy}^{\cdot-}$ ) obtained by treating PDIpy with tetrakis(dimethylamino)ethylene (TDAE) in benzonitrile.

**Fig. S8** Differential absorption spectra obtained upon nanosecond flash photolysis (430 nm) of ZnNc (0.05 mM) in the presence of PDIpy (0.05 mM) in deaerated toluene with several time delays between 2 and 70  $\mu\text{s}$  at room temperature. Inset: Decay profiles of the  $^3\text{ZnNc}^*$  at 600 nm in the argon- and oxygen-saturated solutions.

**Fig. S9** (Upper) UV-visible spectral changes observed during the complexation of ZnNc with PDIpy in benzonitrile. (Lower) Benesi-Hildebrand analysis of the absorbance data.

**Fig. S10** Fluorescence spectra of PDIpy in the presence of various amounts of ZnNc in benzonitrile

( $\lambda_{\text{ex}} = 490 \text{ nm}$ ). Inset: Benesi-Hildebrand analysis of the fluorescence data.

**Fig. S11** (Upper) Differential absorption spectra obtained upon femtosecond flash photolysis (390 nm) of ZnNc in deaerated benzonitrile with several time delays between 5 and 3000 ps at room temperature. (Lower) Decay profile of the  $^1\text{ZnNc}^*$  at 912 nm and rise profile of  $^3\text{ZnNc}^*$  at 600 nm.

**Fig. S12.** Differential absorption spectra obtained upon femtosecond flash photolysis (390 nm) of **1** in deaerated benzonitrile with several time delays between 2 and 3000 ps at room temperature.

**Fig. S13** Decay profile of  $^1\text{ZnNc}^*$  (at 912 nm) and rise profile of  $^3\text{ZnNc}^*$  (at 600 nm) of **1** in deaerated benzonitrile;  $\lambda_{\text{ex}} = 390 \text{ nm}$ .

**Fig. S14** (Upper) Differential absorption spectra obtained upon nanosecond flash photolysis (430 nm) of ZnNc in deaerated benzonitrile with several time delays between 2 and 70  $\mu\text{s}$  at room temperature. (Lower) Decay profile of the  $^3\text{ZnNc}^*$  at 600 nm.

**Fig. S15** (Upper) Differential absorption spectra obtained upon nanosecond flash photolysis (430 nm) of ZnNc (0.06 mM) in the presence of PDIpy (0.07 mM) in deaerated benzonitrile with several time delays between 2 and 30  $\mu\text{s}$  at room temperature. (Lower) Decay profile of the  $^3\text{ZnNc}^*$  at 600 nm and the rise profile of the  $\text{ZnNc}^{*+}$  at 980 nm.

**Fig. S16** (Upper) Differential absorption spectra obtained upon nanosecond flash photolysis (430 nm) of ZnNc (0.06 mM) in the presence of PDIpy (0.12 mM) in deaerated benzonitrile with several time delays between 2 and 18  $\mu\text{s}$  at room temperature. (Lower) Decay profile of the  $^3\text{ZnNc}^*$  at 600 nm and the rise profile of  $\text{ZnNc}^{*+}$  at 980 nm.

**Fig. S17** (Left) Decay profiles of the triplet ZnPc at 600 nm with increasing concentrations of PDIpy in deaerated benzonitrile;  $\lambda_{\text{ex}} = 430 \text{ nm}$ . (Right): Pseudo-first-order plot.

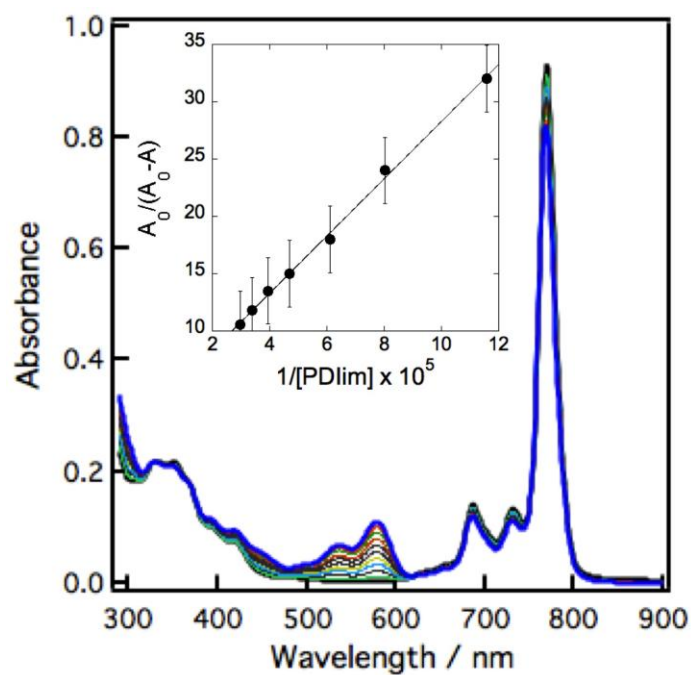

**Fig. S1** UV-visible spectral changes observed during the complexation of ZnNc with PDIIm to form **2** in toluene. Inset: Benesi-Hildebrand analysis of the absorbance data.

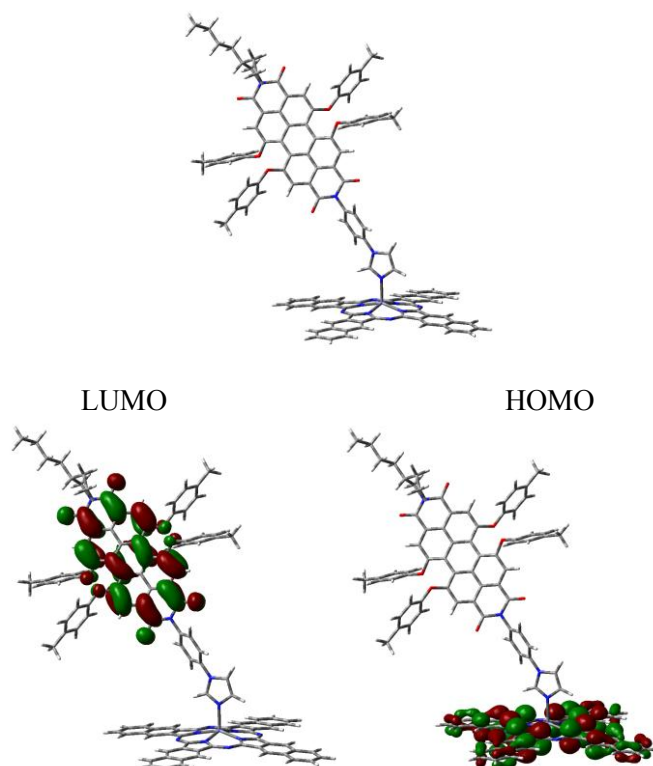

**Fig. S2** Optimized structure and *ab initio* B3LYP/6-311G calculated frontier HOMO and LUMO for the self-assembled dyad **2**.

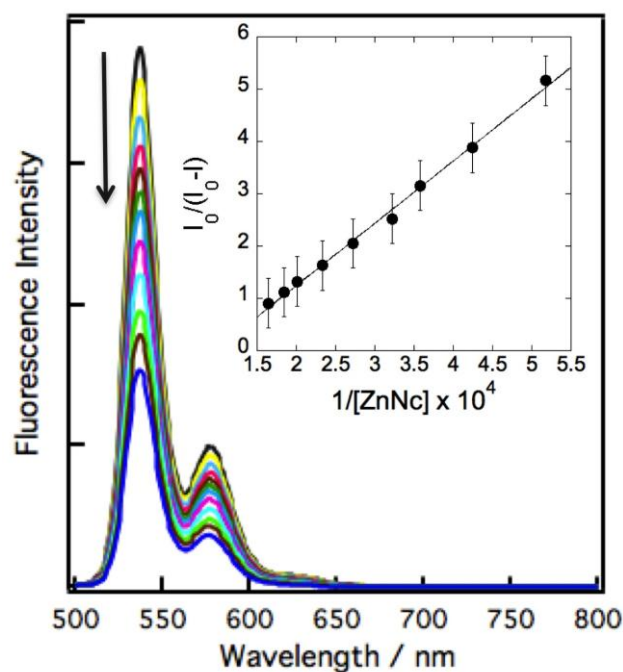

**Fig. S3** Fluorescence spectra of PDIPy (1.46  $\mu\text{M}$ ) in the presence of increasing amounts of ZnNc (0-100  $\mu\text{M}$ ) in toluene ( $\lambda_{\text{ex}} = 480 \text{ nm}$ ). Inset: Benesi-Hildebrand analysis of the fluorescence data.

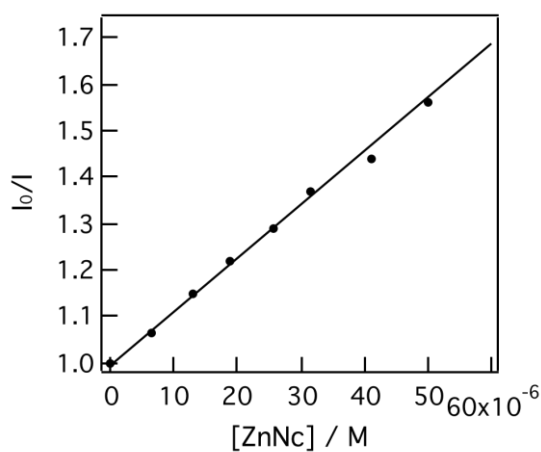

**Fig. S4** Stern-Volmer plot for the fluorescence quenching of PDIPy by ZnNc in benzonitrile;  $\lambda_{\text{ex}} = 480 \text{ nm}$ .

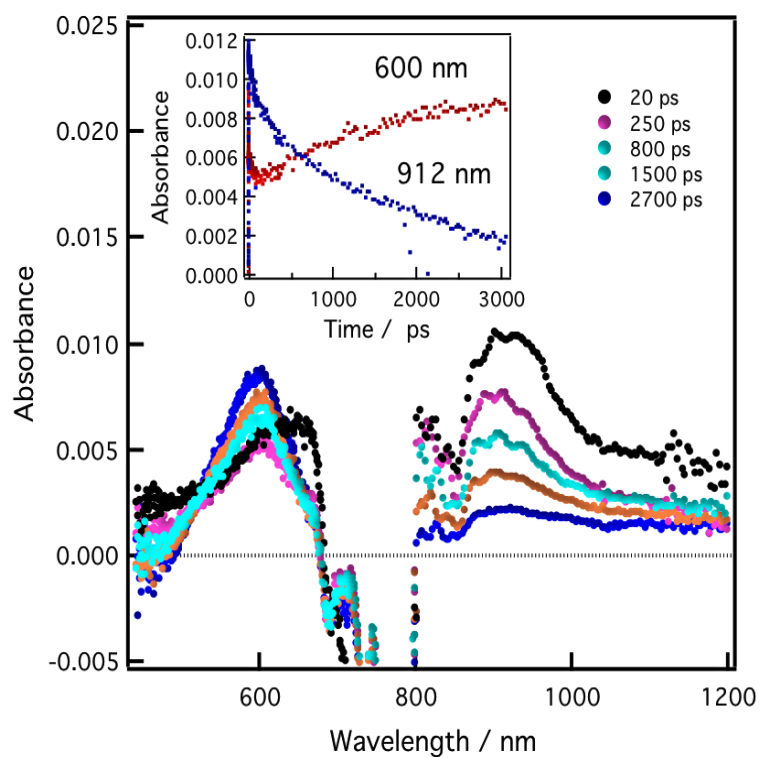

**Fig. S5** Differential absorption spectra obtained upon femtosecond flash photolysis (390 nm) of ZnNc in deaerated toluene with several time delays between 20 and 2700 ps at room temperature. Inset: Decay profile of the  $^1\text{ZnNc}^*$  and rise profile of the  $^3\text{ZnNc}^*$  at 912 and 600 nm, respectively.

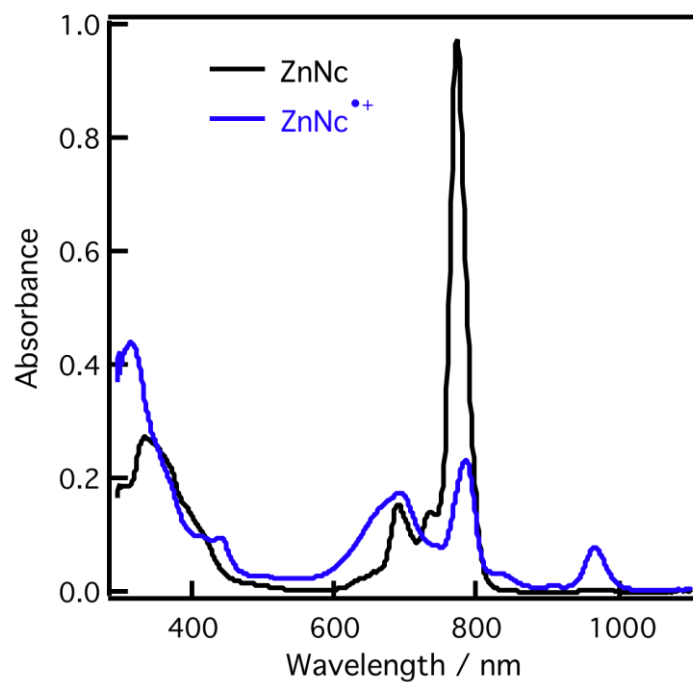

**Fig. S6** Absorption spectra of ZnNc radical cation (ZnNc<sup>•+</sup>) obtained by treating ZnNc with tris(4-bromophenyl)aminium hexachloroantimonate in benzonitrile.

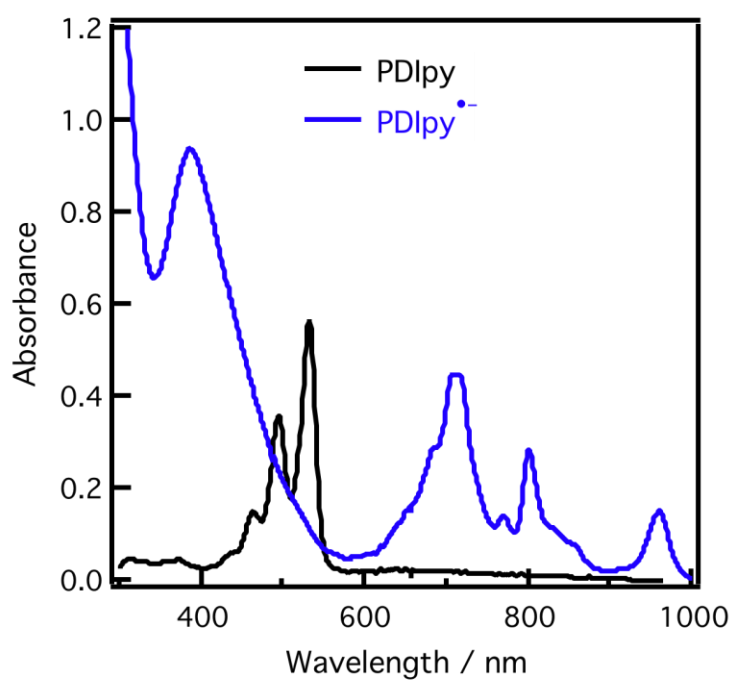

**Fig. S7** Absorption spectra of PDIpy radical anion (PDIpy<sup>•-</sup>) obtained by treating PDIpy with tetrakis(dimethylamino)ethylene (TDAE) in benzonitrile.

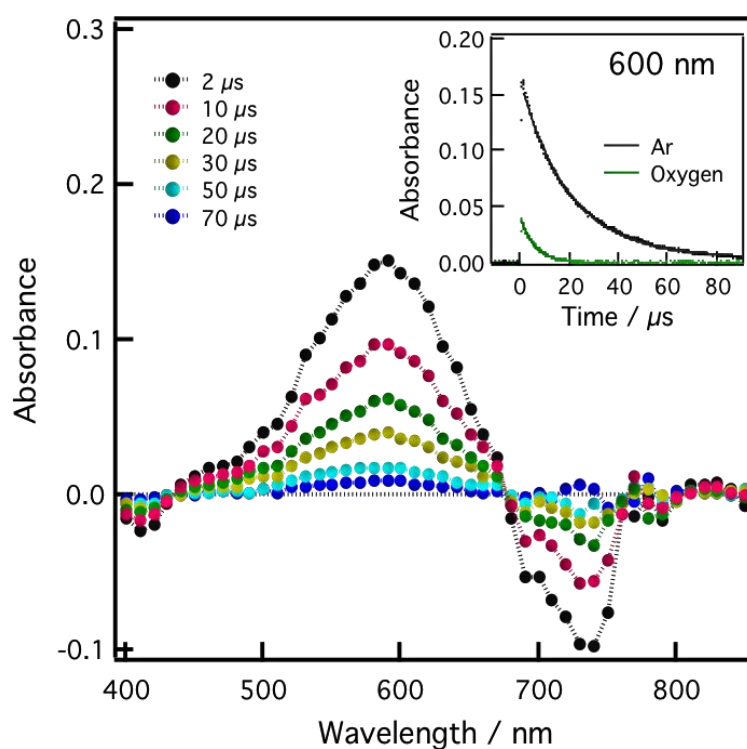

**Fig. S8** Differential absorption spectra obtained upon nanosecond flash photolysis (430 nm) of ZnNc (0.05 mM) in the presence of PDIpy (0.05 mM) in deaerated toluene with several time delays between 2 and 70 μs at room temperature. Inset: Decay profiles of the <sup>3</sup>ZnNc\* at 600 nm in the argon- and oxygen-saturated solutions.

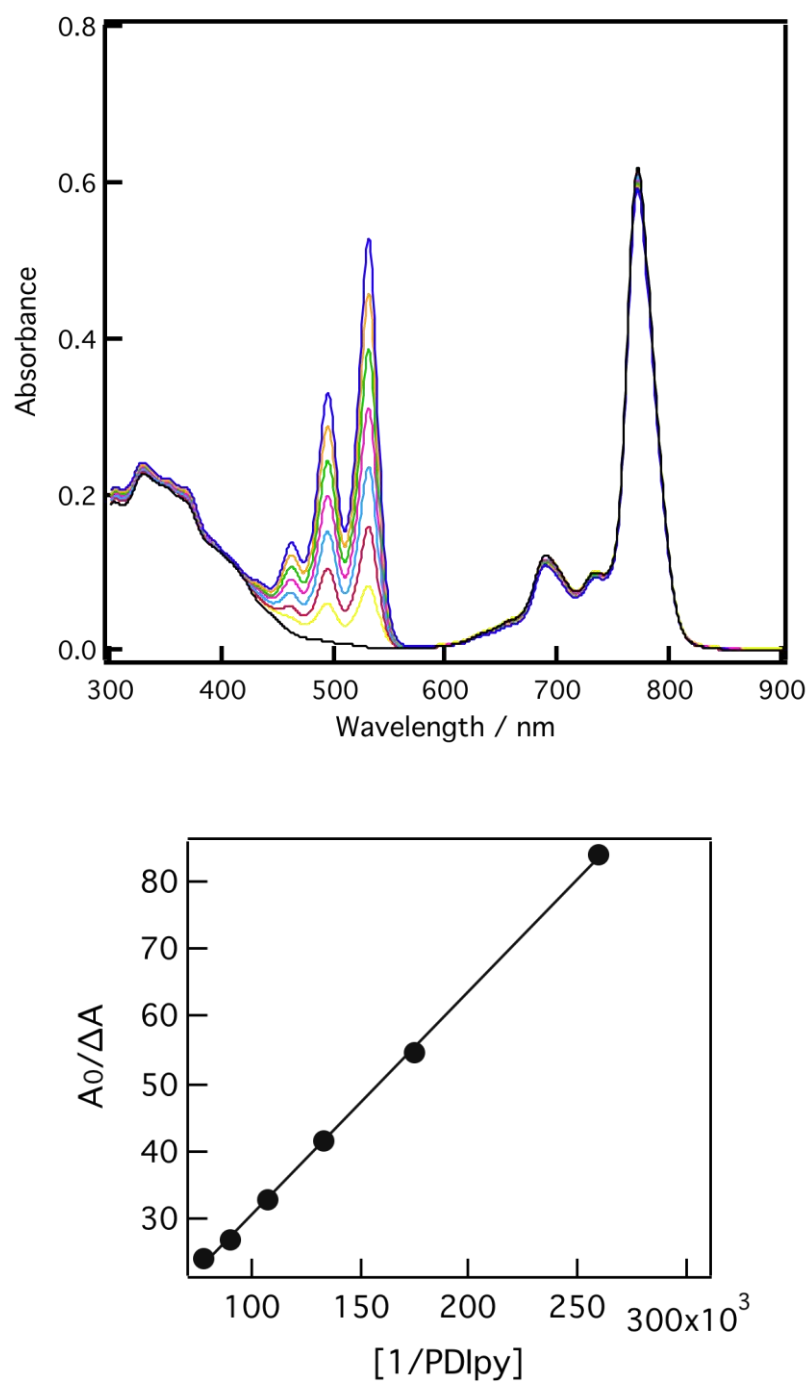

**Fig. S9** (Upper) UV-visible spectral changes observed during the complexation of ZnNc with PDlpy in benzonitrile. (Lower) Benesi-Hildebrand analysis of the absorbance data.



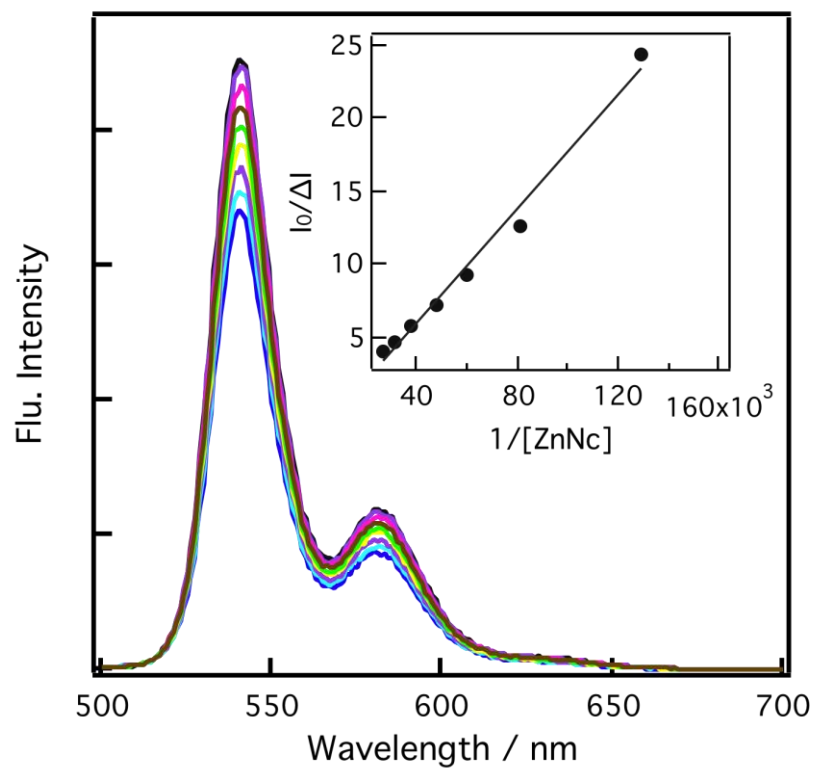

**Fig. S10** Fluorescence spectra of PDIpy in the presence of various amounts of ZnNc in benzonitrile ( $\lambda_{\text{ex}} = 490$  nm). Inset: Benesi-Hildebrand analysis of the fluorescence data.

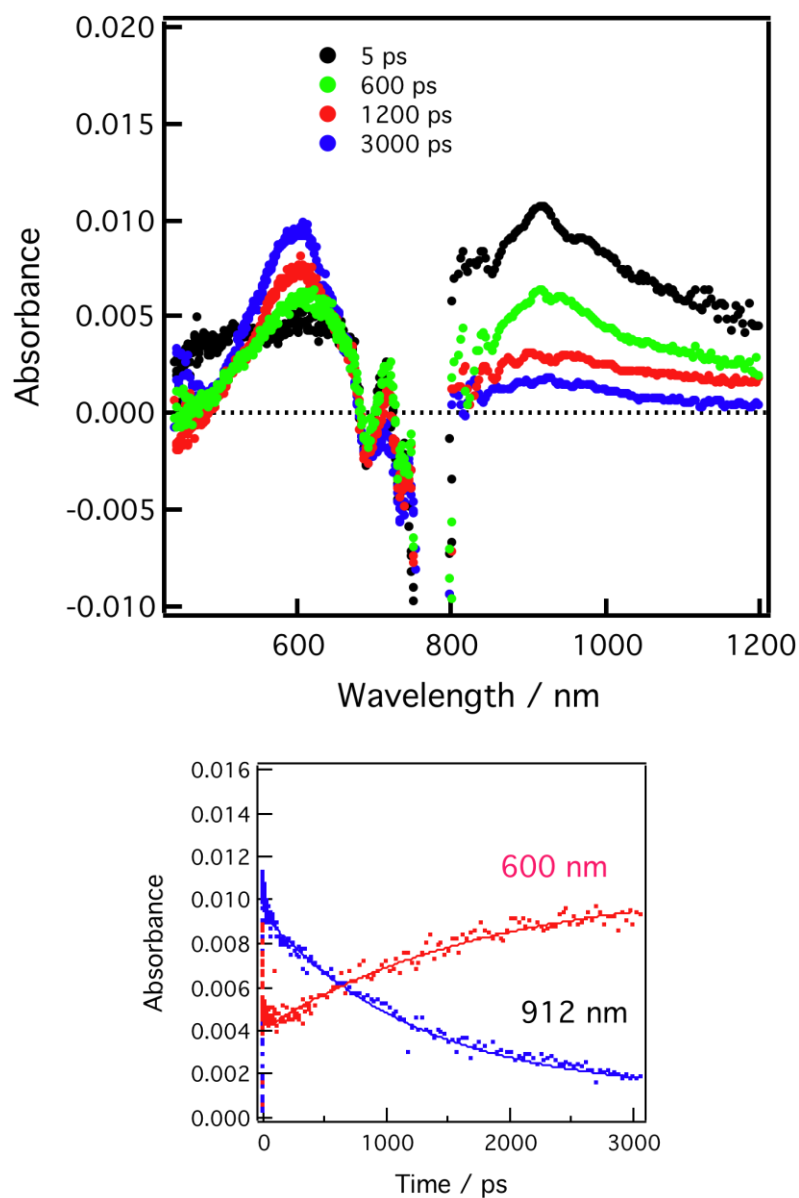

**Fig. S11** (Upper) Differential absorption spectra obtained upon femtosecond flash photolysis (390 nm) of ZnNc in deaerated benzonitrile with several time delays between 5 and 3000 ps at room temperature. (Lower) Decay profile of the  $^1\text{ZnNc}^*$  at 912 nm and rise profile of  $^3\text{ZnNc}^*$  at 600 nm.

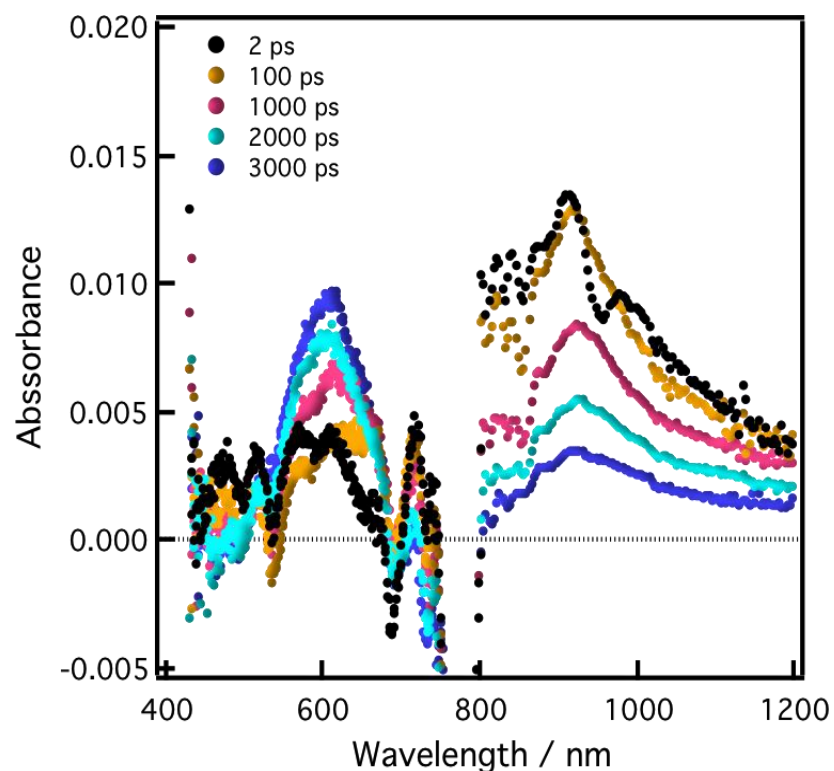

**Fig. S12.** Differential absorption spectra obtained upon femtosecond flash photolysis (390 nm) of **1** in deaerated benzonitrile with several time delays between 2 and 3000 ps at room temperature.

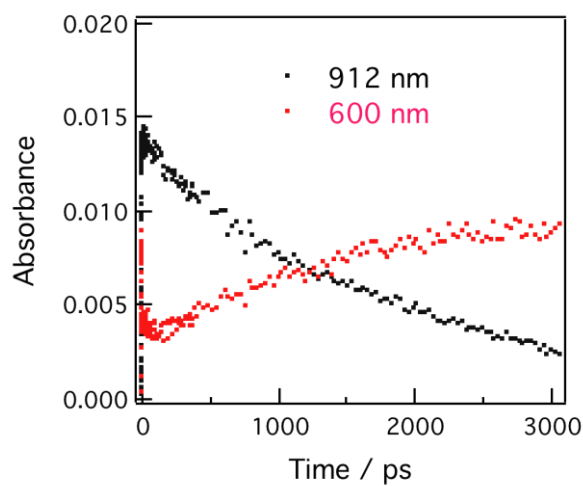

**Fig. S13** Decay profile of  $^1\text{ZnNc}^*$  (at 912 nm) and rise profile of  $^3\text{ZnNc}^*$  (at 600 nm) of **1** in deaerated benzonitrile;  $\lambda_{\text{ex}} = 390$  nm.

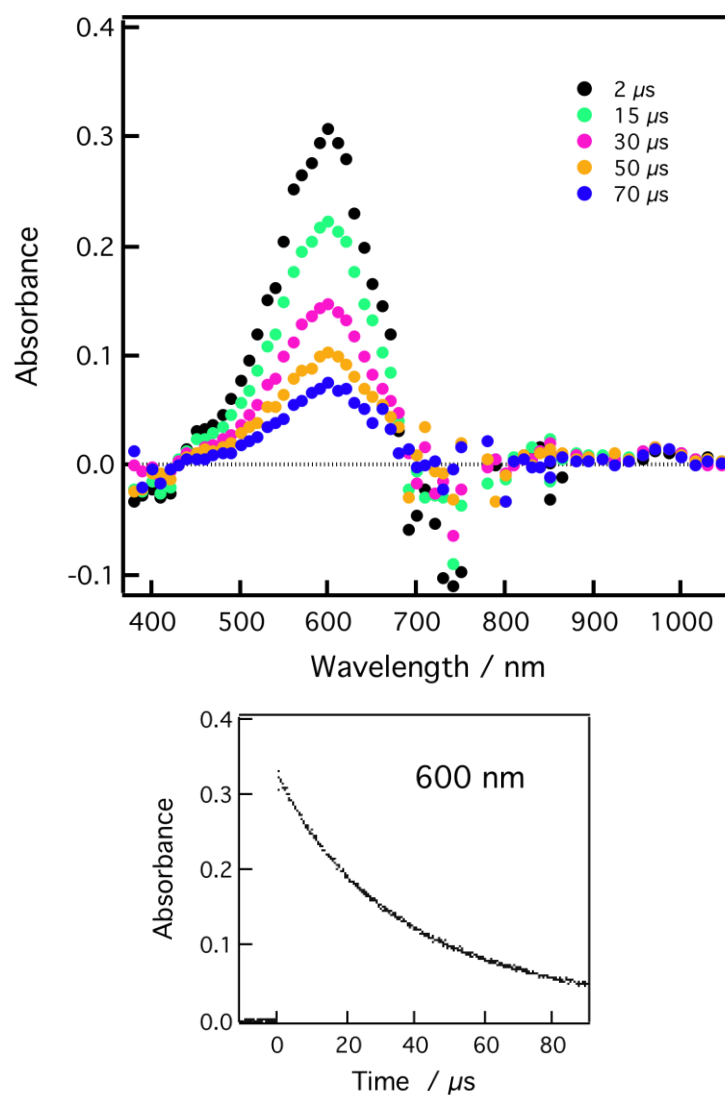

**Fig. S14** (Upper) Differential absorption spectra obtained upon nanosecond flash photolysis (430 nm) of ZnNc in deaerated benzonitrile with several time delays between 2 and 70  $\mu$ s at room temperature. (Lower) Decay profile of the  $^3\text{ZnNc}^*$  at 600 nm.

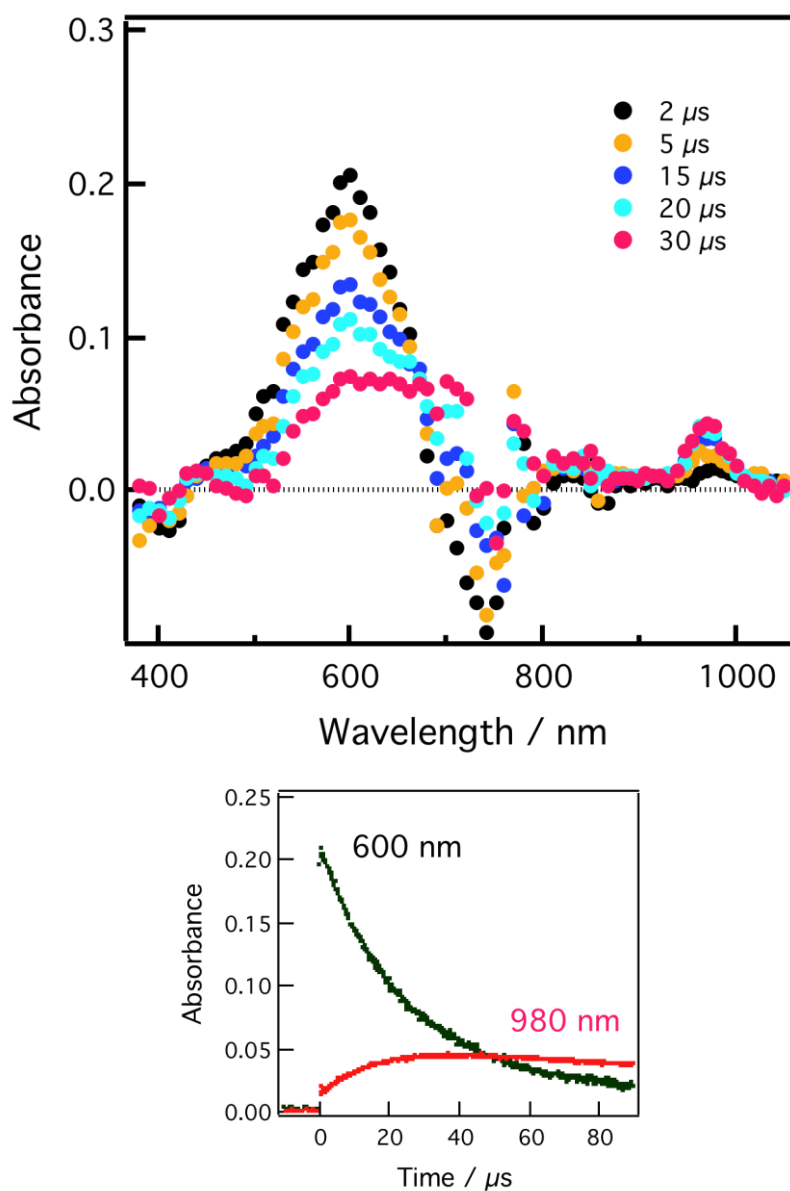

**Fig. S15** (Upper) Differential absorption spectra obtained upon nanosecond flash photolysis (430 nm) of ZnNc (0.06 mM) in the presence of PDIpy (0.07 mM) in deaerated benzonitrile with several time delays between 2 and 30  $\mu$ s at room temperature. (Lower) Decay profile of the  $^3\text{ZnNc}^*$  at 600 nm and the rise profile of the  $\text{ZnNc}^{++}$  at 980 nm.

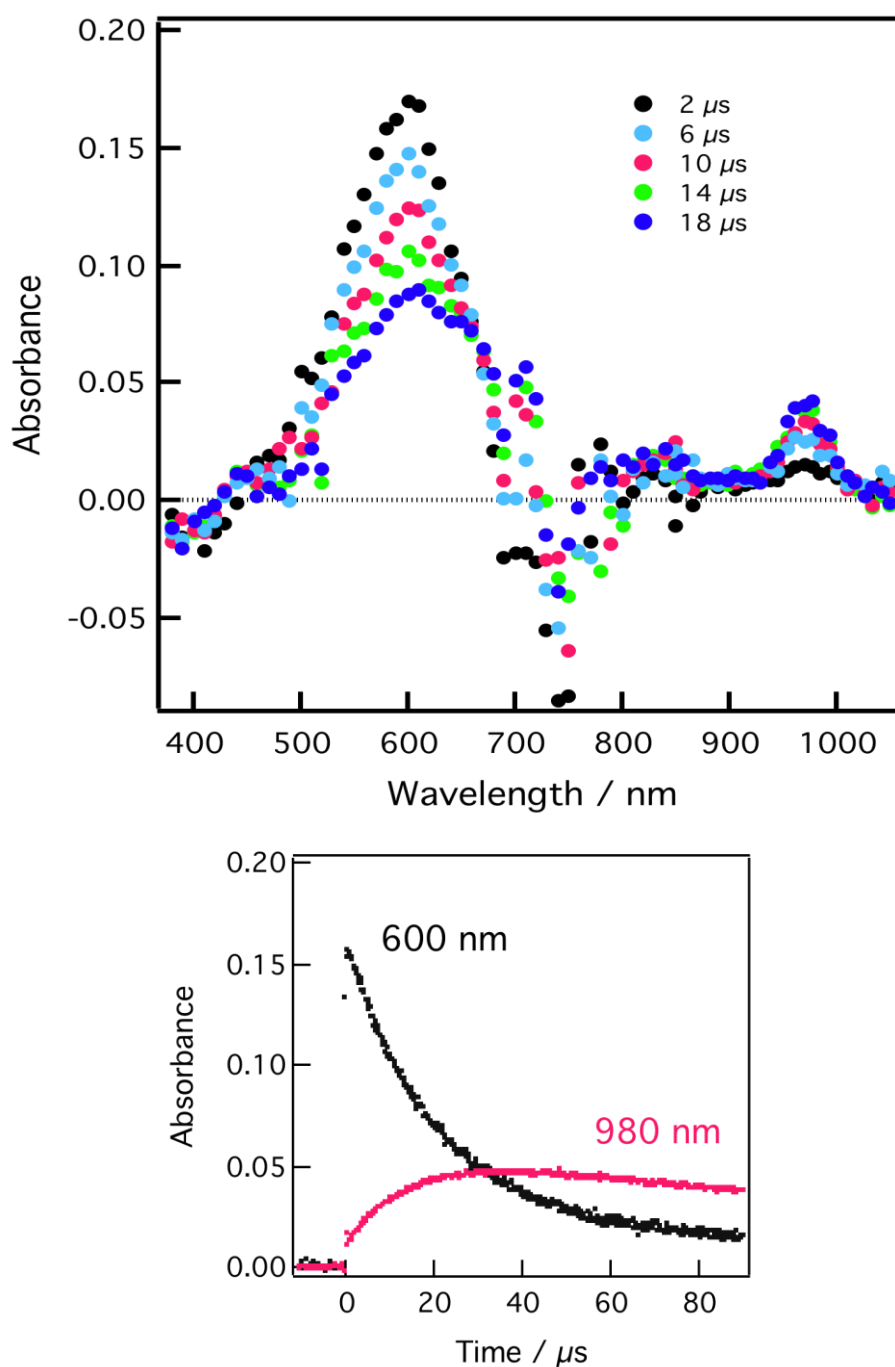

**Fig. S16** (Upper) Differential absorption spectra obtained upon nanosecond flash photolysis (430 nm) of ZnNc (0.06 mM) in the presence of PDIpy (0.12 mM) in deaerated benzonitrile with several time delays between 2 and 18  $\mu$ s at room temperature. (Lower) Decay profile of the  $^3\text{ZnNc}^*$  at 600 nm and the rise profile of  $\text{ZnNc}^{++}$  at 980 nm.

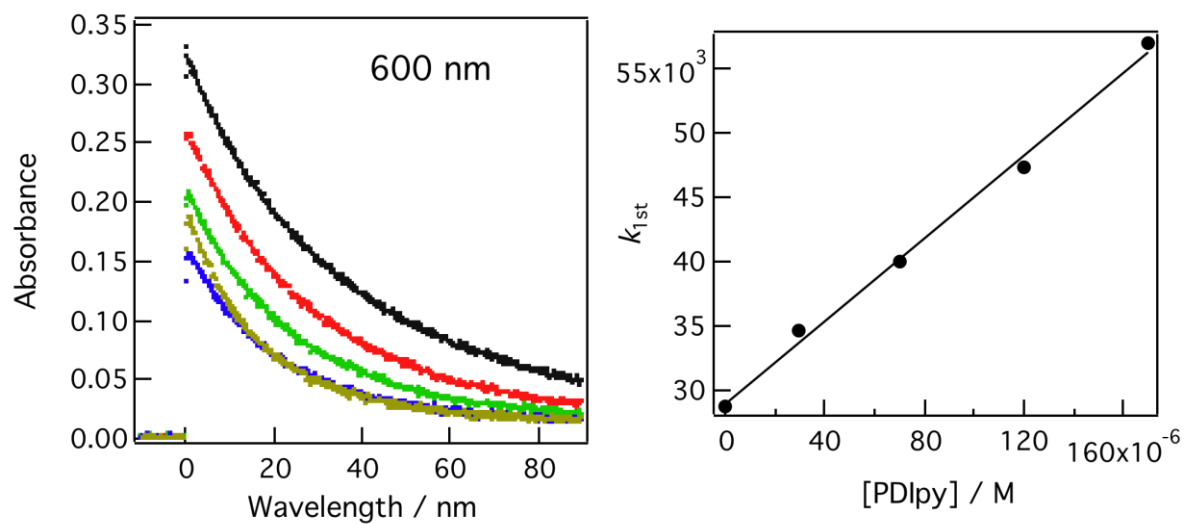

**Fig. S17** (Left) Decay profiles of the triplet ZnPc at 600 nm with increasing concentrations of PDlpy in deaerated benzonitrile;  $\lambda_{ex} = 430$  nm. (Right): Pseudo-first-order plot.
